# Supplementary material
Source: Springer Nature journal article supplement (https://www.springermedizin.de/resource/supplementary/12907_2008_65_MOESM5_ESM.pdf/9525048)

### Patient 1

Liver

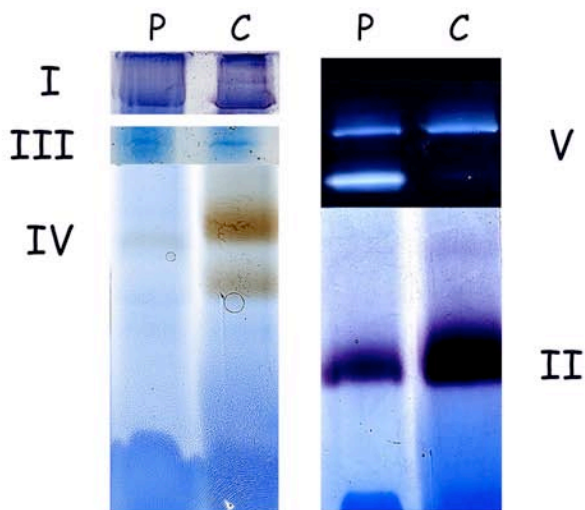

### Patient 2

Muscle

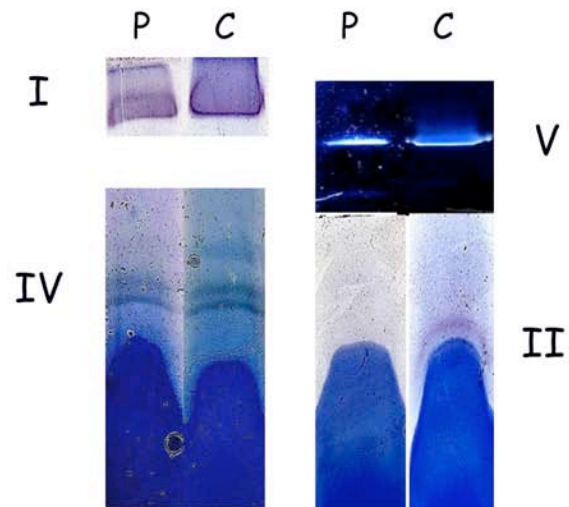

### Patient 3

Muscle

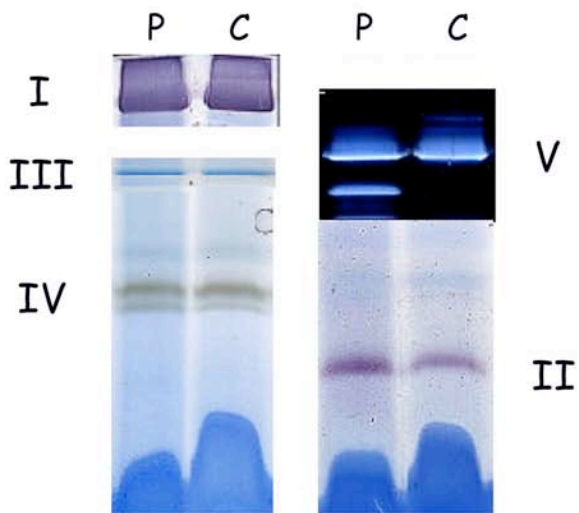

Liver

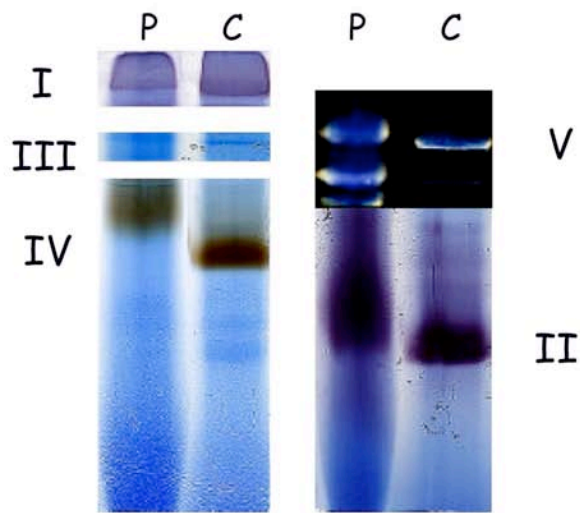

Supplement: MOESM5 [file 9525048]
